# Supplementary material for: Arf6 regulates the cycling and the readily releasable pool of synaptic vesicles at hippocampal synapse
Source: eLife journal article supplement (doi:10.7554/elife.10116), 2016-01-05
Supplement: supp [file elife-10116-supp-v1.zip]

**Arf6 regulates the cycling and the readily releasable pool of synaptic vesicles at hippocampal synapse.**

**Figure 1: figure supplement 1.** Synaptic localization of Arf6

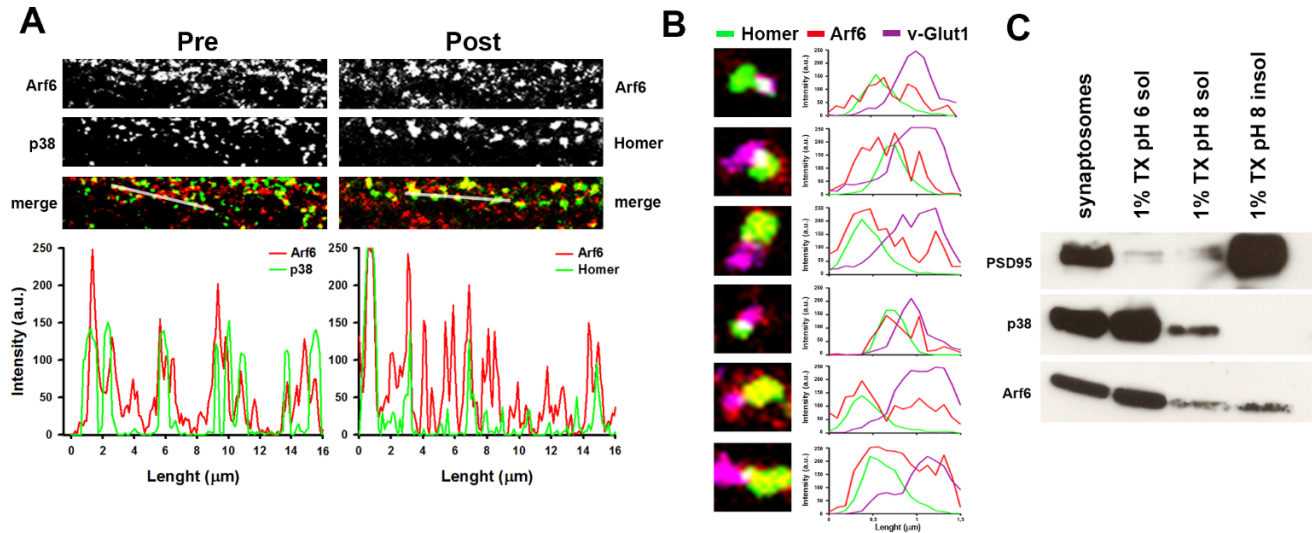

**A**, synaptosomes were extracted with 1% Triton X-100 (TX) at pH 6. The insoluble pellet was re-extracted with 1% Triton TX at pH 8. Equal amounts of soluble (sol) and insoluble (insol) material were analyzed by immunoblotting against the postsynaptic membrane marker PSD95, the presynaptic vesicle marker synaptophysin (p38) and Arf6. **B**, representative images of synapses from rat hippocampal neurons (17 DIV) labelled with Arf6 antibodies and with antibodies against either the presynaptic marker synaptophysin (p38) or the postsynaptic marker Homer antibodies. Merge panels show colocalization and the white lines (16 μm) along which the scans of the two channels were performed. **C**, representative resolved synapses and relative intensity profile from rat hippocampal neurons (17 DIV) triple labelled with Arf6 antibodies, the presynaptic marker v-Glut1 and the postsynaptic marker Homer. Intensity profiles show localization of Arf6 signal at both the pre- and the post-synaptic compartments.
