# Supplementary material for: Arf6 regulates the cycling and the readily releasable pool of synaptic vesicles at hippocampal synapse
Source: eLife journal article supplement (doi:10.7554/elife.10116), 2016-01-05
Supplement: supp [file elife-10116-supp-v1.zip]

**Arf6 regulates the cycling and the readily releasable pool of synaptic vesicles at hippocampal synapse.**

**Figure 1: figure supplement 2.** Tool for silencing Arf6 expression by transduction

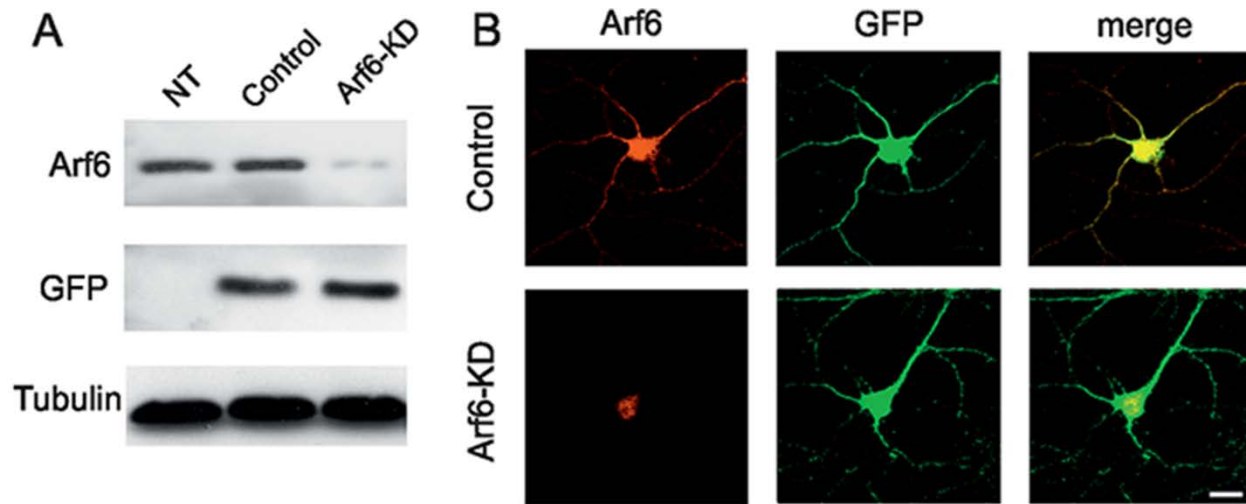

**A**, WB from lysates of rat hippocampal neurons (17 DIV) either transduced at 12 DIV with Arf6 shRNA#1 (Arf6-KD) or an inactive mismatched version (Control) or left untreated (NT). GFP immunoreactivity was evaluated for equal transduction and  $\beta$ -tubulin (Tubulin) for equal loading. **B**, representative images of neurons transduced as above and immunostained with an anti-Arf6 antibody (AVIVA System Biology, U.S.A.). Scale bar, 10  $\mu$ m.
