# Supplementary material for: Arf6 regulates the cycling and the readily releasable pool of synaptic vesicles at hippocampal synapse
Source: eLife journal article supplement (doi:10.7554/elife.10116), 2016-01-05
Supplement: supp [file elife-10116-supp-v1.zip]

**Arf6 regulates the cycling and the readily releasable pool of synaptic vesicles at hippocampal synapse.**

**Figure 5: figure supplement 2.** SypHy expression at Arf6-silenced synapses and effect of Arf6 shRNA#2.

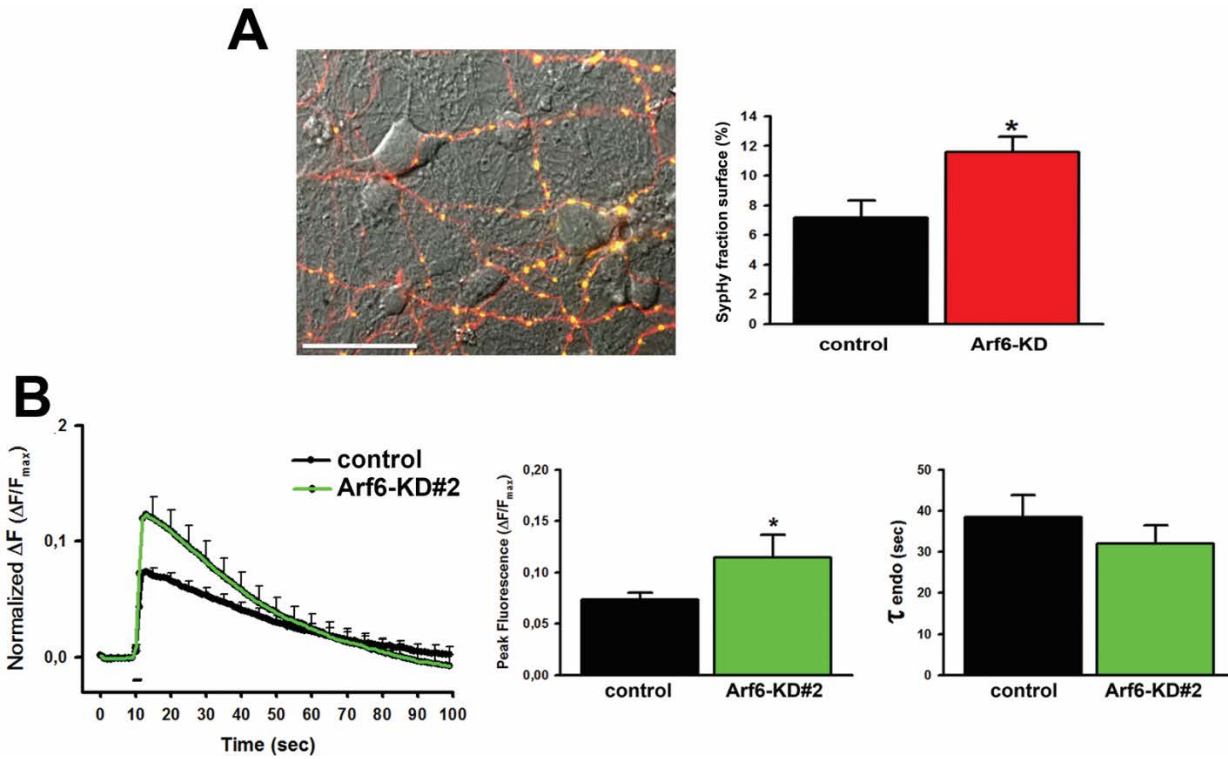

**A, left panel**, representative panel with superimposed phase contrast image and fluorescence images from rat hippocampal neurons (17DIV) cotransfected with Arf6-shRNA#1 (red) and SytHy (green) to show transfected processes in non-transfected network. Scale bar, 20  $\mu\text{m}$ . **Right panel**, SytHy surface expression, calculated as the signal revealed by acidic MES perfusion, was expressed in percent of the total signal revealed by  $\text{NH}_4\text{Cl}$  perfusion. Data are means  $\pm$  SEM of 6-8 coverslips transfected as above. **B, left panel**: ensemble average traces of SytHy fluorescence plotted for control (n=8, black trace) and Arf6 shRNA #2 (Arf6-KD#2; n=6, green trace) neurons stimulated with 40APs@20Hz (dotted line). Data are means with SEM values shown every 5 time points. **Middle panel**: means  $\pm$  SEM of peak fluorescence at the end of the stimulus. **Right panel**: means  $\pm$  SEM of time constant of endocytosis evaluated by fitting the fluorescence decay after stimulation by a single exponential function. Statistical analysis was performed with the unpaired Student's *t*-test. \* $p < 0.05$  versus control.
