# Supplementary material for: Arf6 regulates the cycling and the readily releasable pool of synaptic vesicles at hippocampal synapse
Source: eLife journal article supplement (doi:10.7554/elife.10116), 2016-01-05
Supplement: supp [file elife-10116-supp-v1.zip]

**Arf6 regulates the cycling and the readily releasable pool of synaptic vesicles at hippocampal synapse.**

**Figure 7: figure supplement 1.** Morphometric analysis at the different time point in the HRP functional assay.

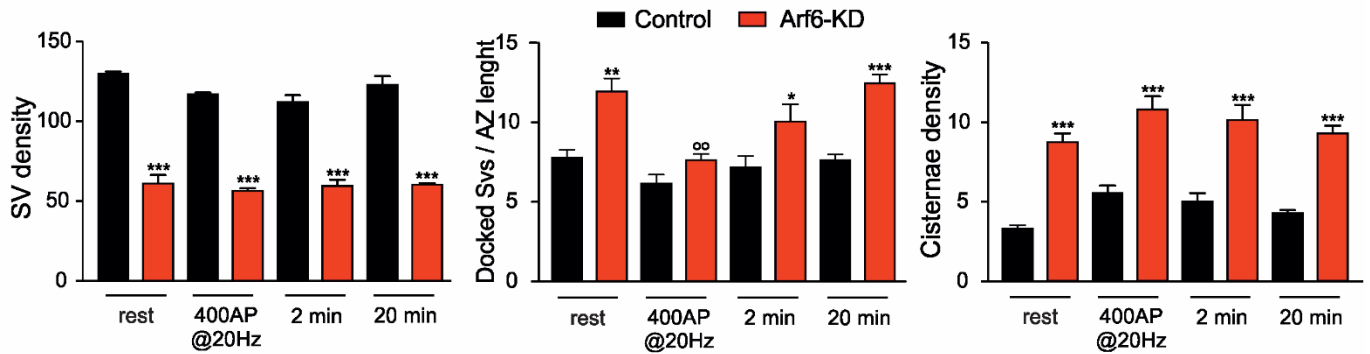

Density of SVs, docked SVs and cisternae in control (black) and Arf6-KD (red) synapses fixed before (rest), during and 2 or 20 min. after field stimulation (400APs@20Hz) in the presence of soluble HRP. Experiments are the same of Figure 4. Statistical analysis was performed with two-way ANOVA followed by the Bonferroni's multiple comparison test. \* $p < 0.05$ , \*\* $p < 0.01$ , \*\*\* $p < 0.001$  versus control; °°  $p < 0.01$  versus the respective HRP loaded sample.
