# Supplementary material for: Arf6 regulates the cycling and the readily releasable pool of synaptic vesicles at hippocampal synapse
Source: eLife journal article supplement (doi:10.7554/elife.10116), 2016-01-05
Supplement: supp [file elife-10116-supp-v1.zip]

**Arf6 regulates the cycling and the readily releasable pool of synaptic vesicles at hippocampal synapse.**

**Figure 3: figure supplement 1.** SecinH3 treatment inhibits Arf6 activation in hippocampal primary neurons.

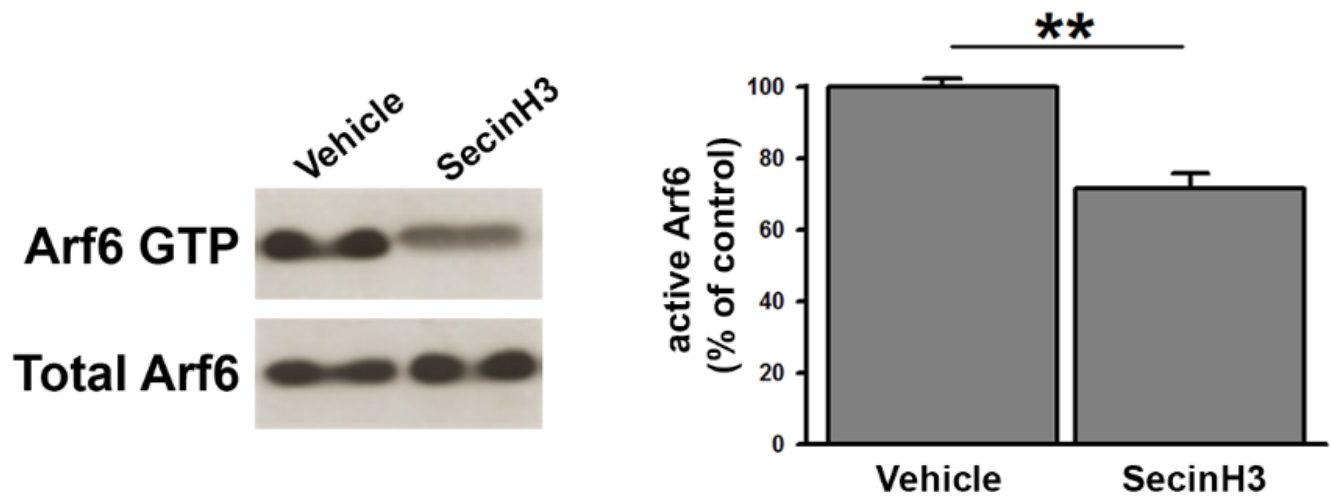

*Left panel*, representative WB of GTP-bound Arf6 (Arf6 GTP) and total Arf6 from lysates of hippocampal neurons (17DIV) treated for 3hrs with either 30  $\mu$ M secinH3 (SecinH3) or DMSO (Vehicle). Active GTP-bound ARF6 (Arf6 GTP) was precipitated with GST-GGA3. *Right panel*, densitometric analysis of active Arf6 from three independent experiments. \*\* $p < 0.01$  versus vehicle.
