# Supplementary material for: Arf6 regulates the cycling and the readily releasable pool of synaptic vesicles at hippocampal synapse
Source: eLife journal article supplement (doi:10.7554/elife.10116), 2016-01-05
Supplement: supp [file elife-10116-supp-v1.zip]

Archive with 8 entries (8 files):
- elife_poa_e10116_Figure_1_figure_supplement_1.pdf
- elife_poa_e10116_Figure_3_figure_supplement_1.pdf
- elife_poa_e10116_Figure_1_figure_supplement_3.pdf
- elife_poa_e10116_Figure_1_figure_supplement_2.pdf
- elife_poa_e10116_Supplementary_File_1.docx
- elife_poa_e10116_Figure_5_figure_supplement_1.pdf
- elife_poa_e10116_Figure_7_figure_supplement_1.pdf
- elife_poa_e10116_Figure_5_figure_supplement_2.pdf
